# Supplementary material
Source: PubMed Central journal article supplement (PMC4129937)
Supplement: NIHMS59945-supplement-1.pdf [file NIHMS59945-supplement-1.pdf]

# White\_Supplementary Figure 1

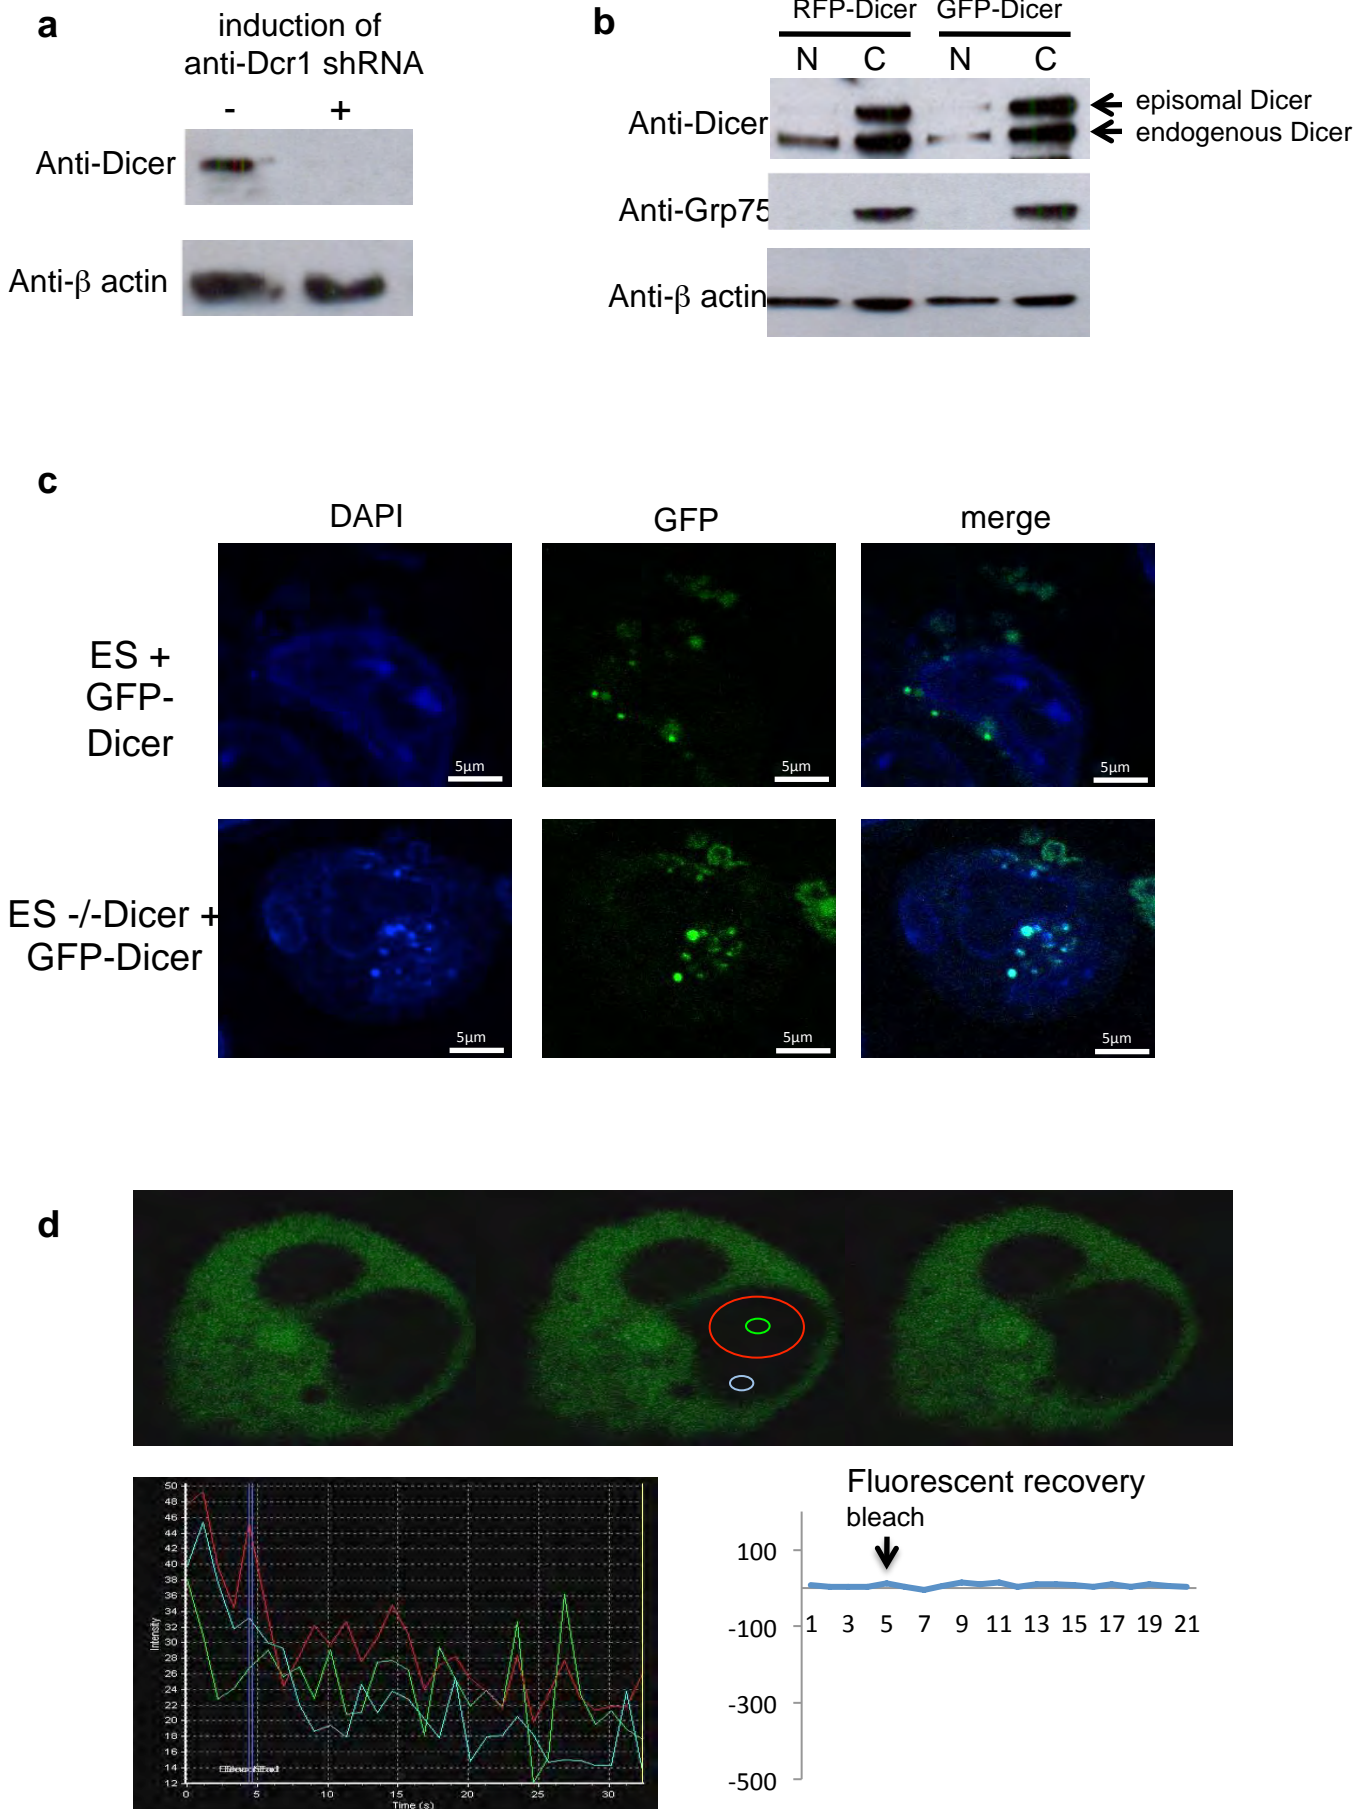

**Supplementary Figure 1. Dicer localizes in both nucleus and cytoplasm of HEK293 cells.**

a) Western blot analysis of protein extracts from HEK293 cells with inducible integrated shRNA transgene. Induction by doxycycline leads to Dicer-specific shRNA production and consequent Dicer knockdown. Antibodies specific to Dicer and  $\gamma$ -actin were employed.

b) Western blot analysis of Dicer in nuclear and cytoplasmic extracts from HEK293 cells transfected with episomal GFP-Dicer or RFP-Dicer expressing plasmids. Grp75 and  $\gamma$ -actin were used as controls.

c) Expression of GFP-Dicer transgene (green) in normal and Dicer knockout murine embryonic stem cells as in Figure 1b.

d) Control FRAP experiment shows Dicer-GFP (green) recovery in nucleus of HEK293 cells (lacking GFP signal) after bleaching. This provides a background control to FRAP analysis of GFP-Dicer expression in the nucleus of Dicer knockdown cells. Here, only background signals can be detected. The cell is shown in the left hand panel before bleaching. In the middle panel, the red circle corresponds to bleached area in nucleus. Fluorescent recovery was measured in the green circle. Fluorescent background values were measured in the blue circle. Fluorescent recovery was measured in 20 frames, bleaching was initiated at frame 5. Right-hand panel shows the cell after recovery. Absolute levels of fluorescence and relative levels of recovery (background fluorescence subtracted from fluorescence levels in measured region) are shown in the left and right panels, respectively. All experiments described in Supplementary Fig. 1a-c, were replicated three times.

# White\_Supplementary Figure 2

**a**

| Genomic coordinates (hg19) |           |           | MACS score | genomic annotation | nearest gene |                                                                    |
|----------------------------|-----------|-----------|------------|--------------------|--------------|--------------------------------------------------------------------|
| chrom.                     | start     | end       |            |                    | symbol       | full name                                                          |
| chr7                       | 5566155   | 5566639   | 922.62     | terminator         | ACTB         | actin, beta                                                        |
| chr17                      | 66015846  | 66016214  | 176.77     | intergenic         | KPNA2        | karyopherin alpha 2 (RAG cohort 1, importin alpha 1)               |
| chr1                       | 94312891  | 94313381  | 153.32     | promoter           | BCAR3        | breast cancer anti-estrogen resistance 3                           |
| chr7                       | 139025267 | 139025685 | 150.09     | promoter           | LUC7L2       | LUC7-like 2 ( <i>S. cerevisiae</i> )                               |
| chr12                      | 120729400 | 120729672 | 137.94     | intergenic         | SIRT4        | sirtuin 4                                                          |
| chr13                      | 45491894  | 45492223  | 136.96     | intergenic         | NUFIP1       | nuclear fragile X mental retardation protein interacting protein 1 |
| chr11                      | 66115407  | 66115892  | 122.53     | promoter           | B3GNT1       | UDP-GlcNAc:betaGal beta-1,3-N-acetylglucosaminyltransferase 1      |
| chr1                       | 153643602 | 153643972 | 119.26     | promoter           | ILF2         | interleukin enhancer binding factor 2, 45kDa                       |
| chr9                       | 35657672  | 35658032  | 116.98     | promoter           | RMRP         | RNA component of mitochondrial RNA processing endoribonuclease     |
| chr2                       | 43037481  | 43037893  | 115.62     | intergenic         | HAO          | 3-hydroxyanthranilate 3,4-dioxygenase                              |
| chr6                       | 126101203 | 126101805 | 114.93     | promoter           | NCOA7        | nuclear receptor coactivator 7                                     |
| chr2                       | 70475997  | 70476371  | 106.97     | promoter           | TIA1         | TIA1 cytotoxic granule-associated RNA binding protein              |

**b**

| Genomic coordinates (hg19) |           |           | MACS score | genomic annotation | nearest gene |
|----------------------------|-----------|-----------|------------|--------------------|--------------|
| chr12                      | 20704354  | 20704656  | 393.00     | intron             | PDE3A        |
| chr11                      | 10822850  | 10823053  | 187.94     | terminator         | SNORD97      |
| chr7                       | 142375331 | 142375541 | 213.69     | terminator         | MTRNR2L6     |
| chr3                       | 155378874 | 155379079 | 236.54     | promoter           | PLCH1        |

**c**

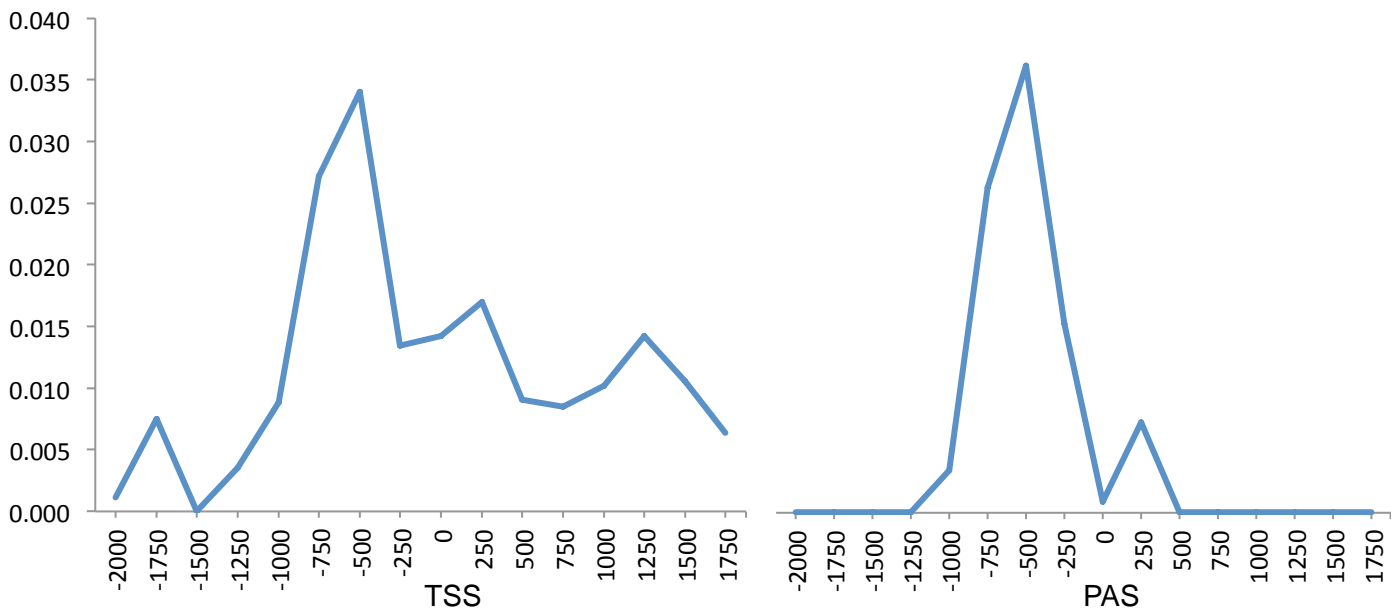

# White\_Supplementary Figure 2

**d**

| type      | number of dicer peaks overlapping the elements | expected | p-value (right handed) | significance                   |
|-----------|------------------------------------------------|----------|------------------------|--------------------------------|
| LINE      | 20                                             | 31       | 0.996                  | Significantly underrepresented |
| SINE      | 9                                              | 27       | 1                      | Significantly underrepresented |
| LTR       | 8                                              | 13       | 0.957                  | Significantly underrepresented |
| Satellite | 16                                             | 1        | 0                      | Significantly overrepresented  |
| rRNA      | 15                                             | 0        | 0                      | Significantly overrepresented  |
| tRNA      | 38                                             | 0        | 0                      | Significantly overrepresented  |

**e**

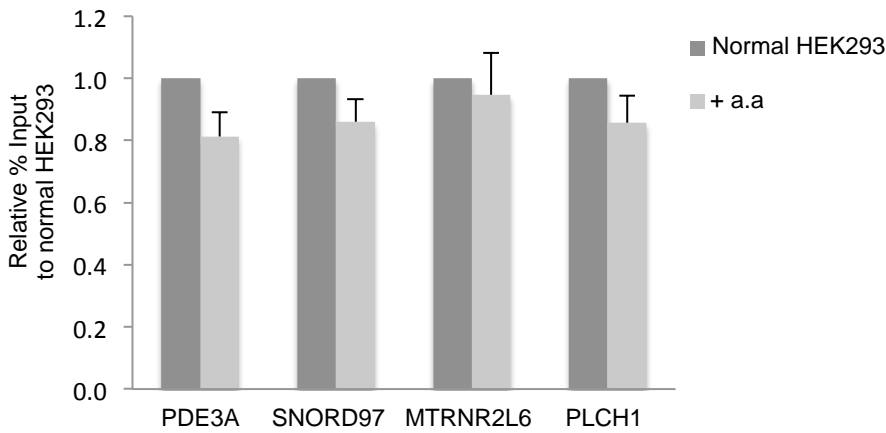

**f**

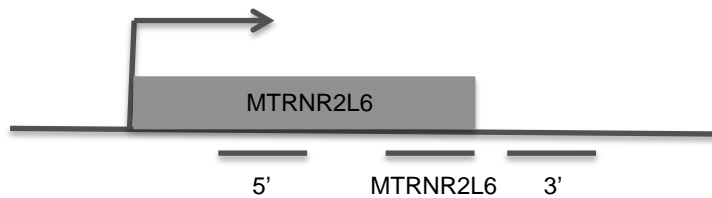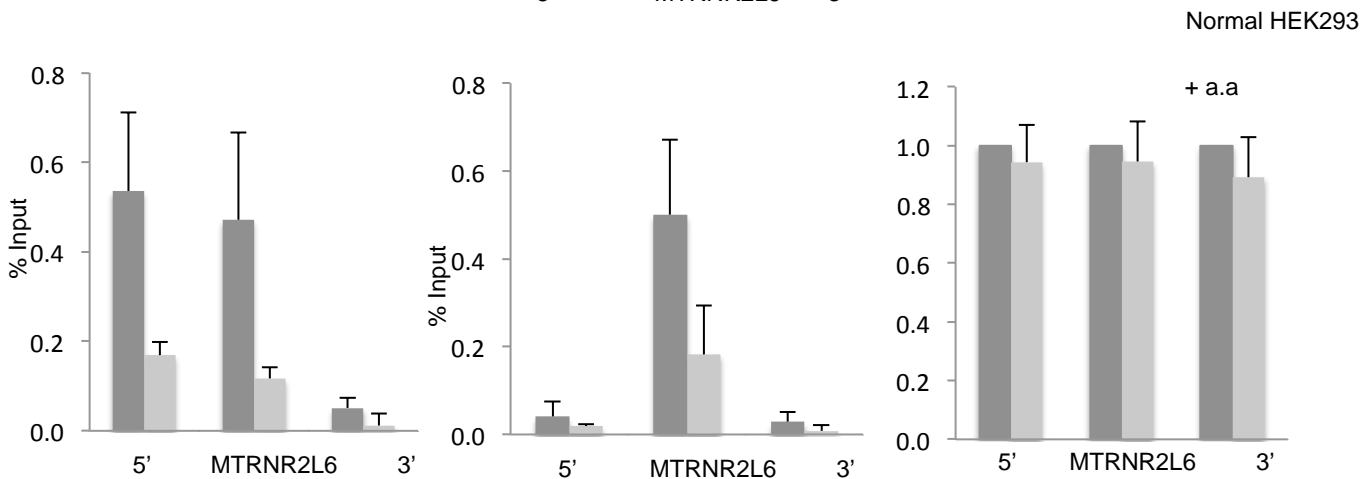

## **Supplementary Figure 2. Genomic annotation of Dicer ChIP-seq peaks.**

a) Table showing the top 12 peaks of Dicer binding loci according to the ChIP sequencing data. Nearest gene identity is shown.

b) The 4 additional loci chosen for further analysis, showing a range of Dicer binding

c) Metagene analysis of top 118 Dicer binding sites (ChIP-seq peaks) showing their location distribution around TSS and PAS of coding genes in the human genome. Data were grouped into 250 nt bins. Each bin-midpoint was plotted on the graph.

d) Table summarising the enrichment of repetitive DNA sequence elements in the Dicer ChIP-seq data. The RepeatMasker hg19 table was used to extract genomic repetitive elements. Repetitive element overlapping a Dicer peak with 5 nt or more was included in the analysis. Each category of repetitive elements as presented, was analysed separately. p-values are based on a background distribution of sampling 118 random genomic sequences of the same length as Dicer peaks. Sampling was performed more than 1000 times.

e) H3 control ChIP experiment as in Figure 2e.

f) Top panel: Diagram of the MTRNR2L6. The start site of transcription (arrow) and the position of the PCR amplicons (bold) are indicated. Bottom panels: Pol II, Dicer and H3 ChIP experiments as in Figure 2e.

# White\_Supplementary Figure 3

**a**

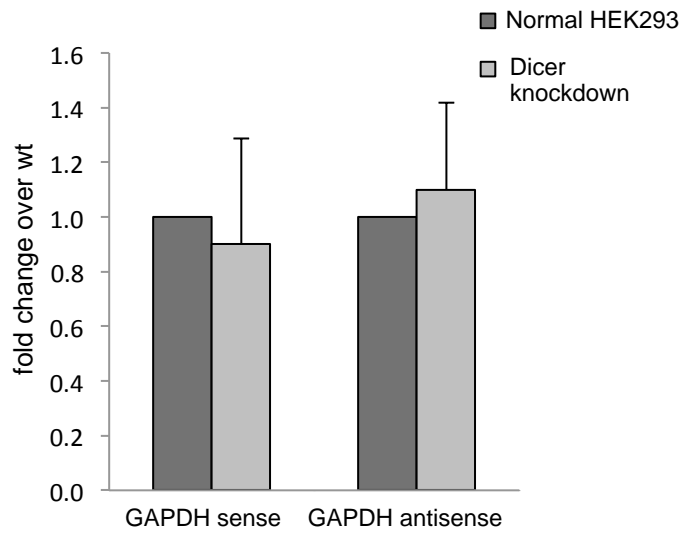

**b**

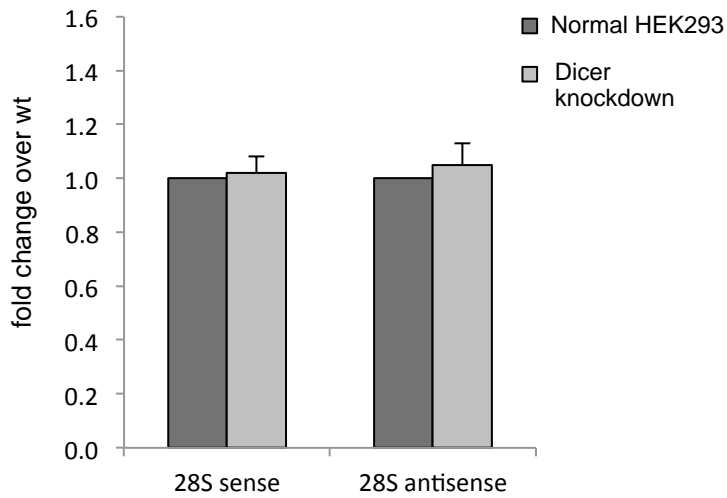

**Supplementary Figure 3. Dicer and Pol II binding affect each other at selected loci.**

a) qRT-PCR as in Fig 3d and 3e. Probes were specific to GAPDH and b) 28S rDNA.

# White\_Supplementary Figure 4

**a**

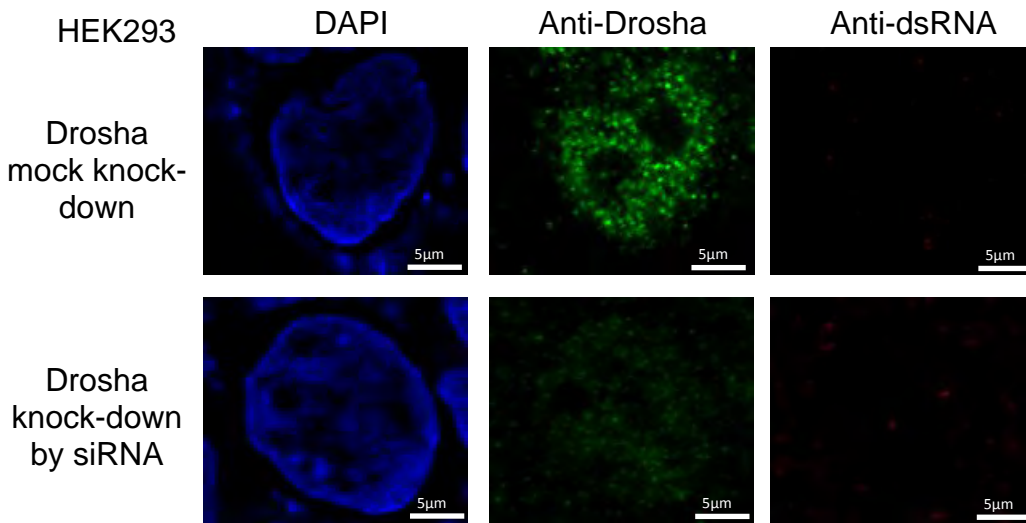

**b**

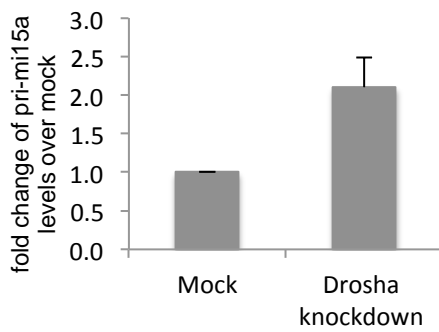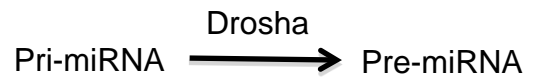



**Supplementary Figure 4. Loss of Drosha has no effect on the accumulation of long dsRNA.**

a) IF as in Fig. 1a using anti-Drosha and J2 antibodies on normal and Drosha knockdown HEK293 cells.

b) Levels of pri-mRNA15a transcripts as determined by qRT-PCR analysis using a specific primer for reverse transcription. RNA was isolated from normal HEK293 cells and cells treated with an shRNA against Drosha for 10 days. Signals are based on average values  $\pm$  s.d. from three independent biological experiments and are normalised to the levels of transcripts in normal cells, set as 1.

White\_Supplementary Figure 5

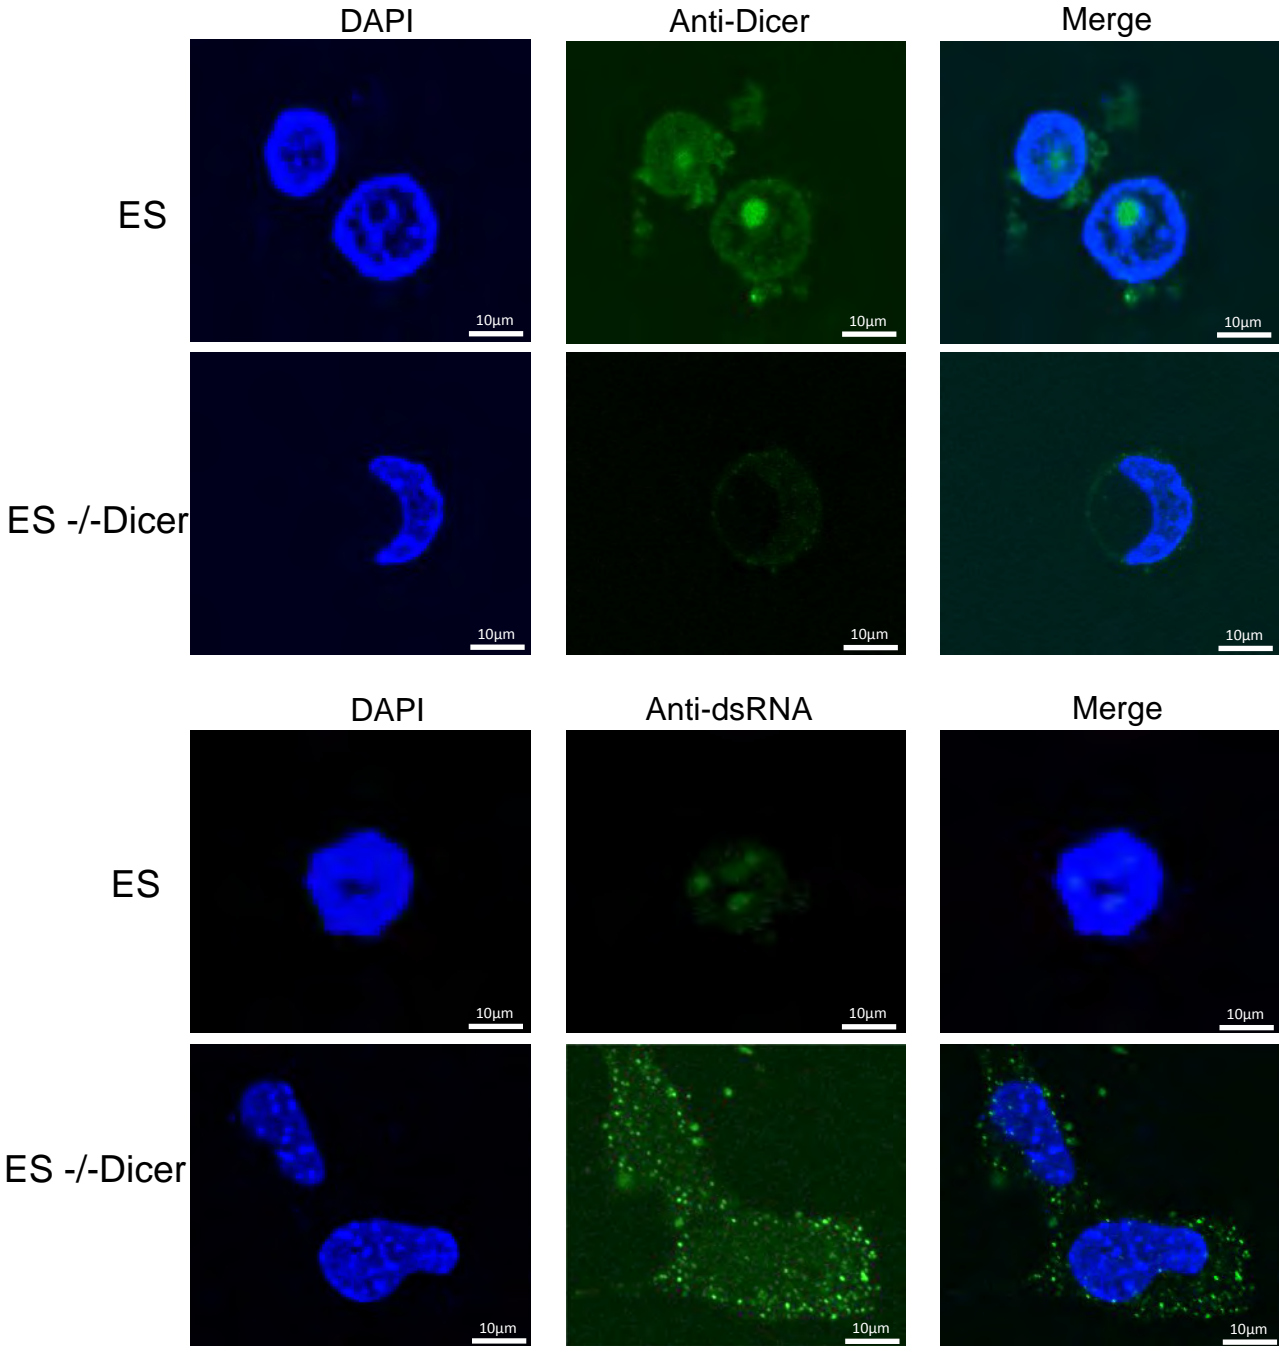

**Supplementary Figure 5. Loss of Dicer leads to accumulation of long dsRNA.**

IF as in Fig. 1a using anti-Dicer and J2 antibodies on Dicer knockout murine embryonic stem cells.

# White\_Supplementary Figure 6

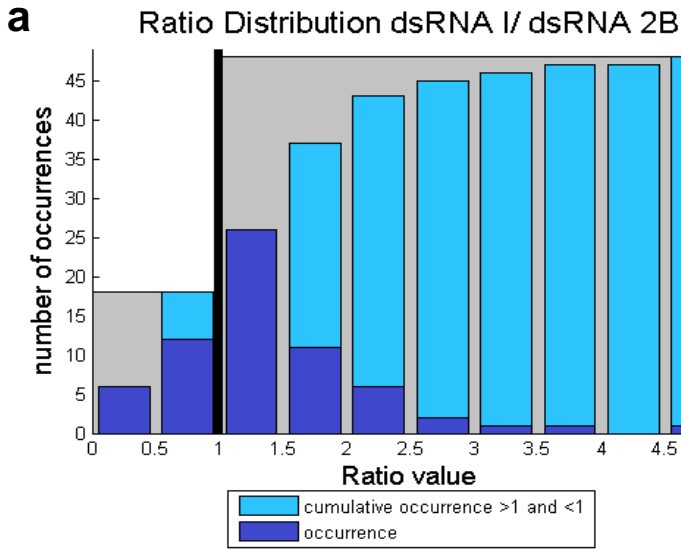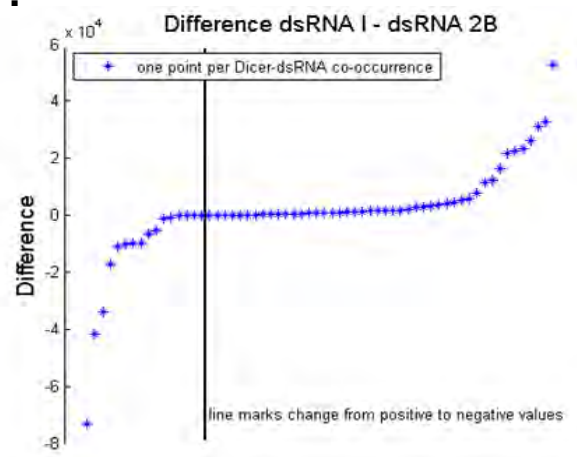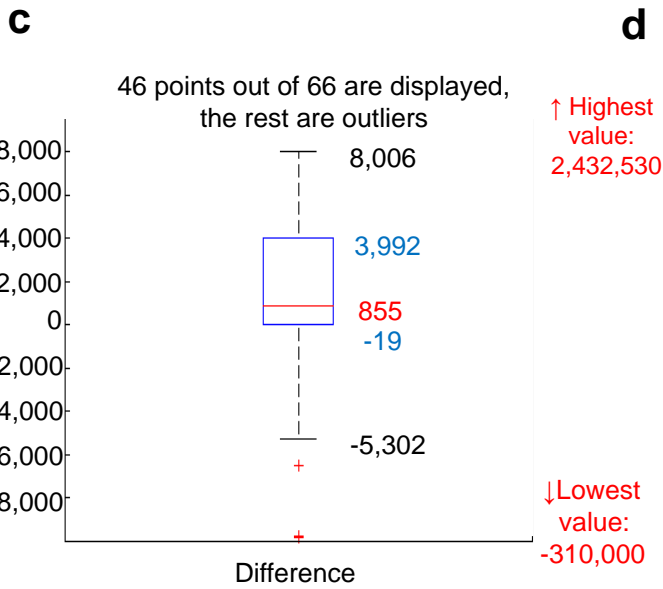

**d**

| type      | number of dicer peaks overlappi n the elements | expected | p-value (right handed) | significance                   |
|-----------|------------------------------------------------|----------|------------------------|--------------------------------|
| LINE      | 71                                             | 211      | 1                      | Significantly underrepresented |
| SINE      | 70                                             | 153      | 1                      | Significantly underrepresented |
| LTR       | 17                                             | 90       | 1                      | Significantly underrepresented |
| Satellite | 0                                              | 5        | 1                      | Significantly underrepresented |
| rRNA      | 200                                            | 0        | 0                      | Significantly overrepresented  |
| tRNA      | 188                                            | 0        | 0                      | Significantly overrepresented  |

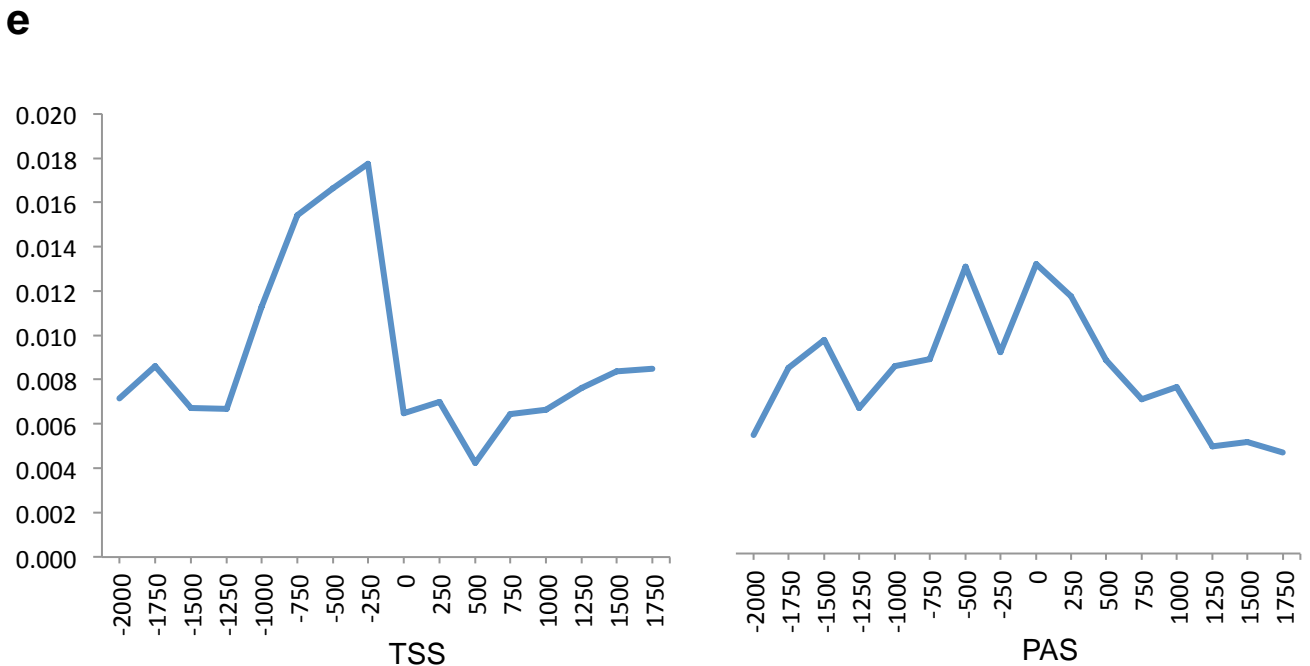

**Supplementary Figure 6. Loss of Dicer leads to accumulation of dsRNA.**

a) Histogram of peak summit ratio of dsRNA in Dicer knockdown cells to dsRNA in normal cells. Any dsRNA signal  $>10$  in both uninduced and induced cells was considered. Value higher than 1 indicates accumulation of dsRNA and value lower than 1 indicates a decrease in dsRNA levels in Dicer knockdown cells. The black line marks the value of 1. Dark blue bins indicate the number of times a ratio falls in value span marked on the horizontal axis. Light blue bins represent a cumulative number for the values under 1 or over 1 separately. Centromeric repeat regions were excluded from analysis.

b) Diagram of the change level in dsRNA (according to peak summit value) accumulation in normal and Dicer knockdown cells. Any dsRNA signal  $>10$  in both uninduced and induced cells was considered. Plotted levels from normal cells are subtracted Dicer knockdown cell levels. Value less than 0 (marked by a black vertical line) indicates the absolute value of the decrease in dsRNA, while a value greater than 0 indicates an increase. Each blue point depicts one locus of Dicer-dsRNA co-localization. The loci were ordered according to the difference value in ascending order. One point is too large to be depicted in the plot, it has value 2432530. Note the scale of the graph is ( $\times 10^4$ ). Centromeric repeat regions were excluded from analysis. c) Box Plot of change in dsRNA levels (according to peak summit value) between Dicer knockdown and normal cells. Any dsRNA signal  $>10$  in both uninduced and induced cells was considered. The red mark indicated the median, at a value of 855. The lower quartile  $q_1$  (25<sup>th</sup> percentile) is at -19 and the upper quartile  $q_3$  (75<sup>th</sup> percentile) at 3992 (blue box). The shift in the positive direction of the box shows a general increase in dsRNA at Dicer loci. 20 outlier

values were excluded from the plot. Centromeric repeat regions were excluded from analysis.

d) Tabular summary of enrichment of repetitive elements in dsRNA-seq data. The RepeatMasker hg19 table was used to extract genomic repetitive elements. Repetitive element overlapping a dsRNA peak with 5 nt or more was included in the analysis. Each category of repetitive elements as presented, was analysed separately. p-values are based on a background distribution of sampling 118 random genomic sequences of the same length as Dicer peaks. Sampling was performed more than 1000 times.

e) Metagene analysis of top dsRNA peaks (see Online Methods) showing location distribution around TSS and PAS of coding genes in the human genome. Data were grouped into 250 nt bins. Each bin-midpoint was plotted on graph.

# White\_Supplementary Figure 7

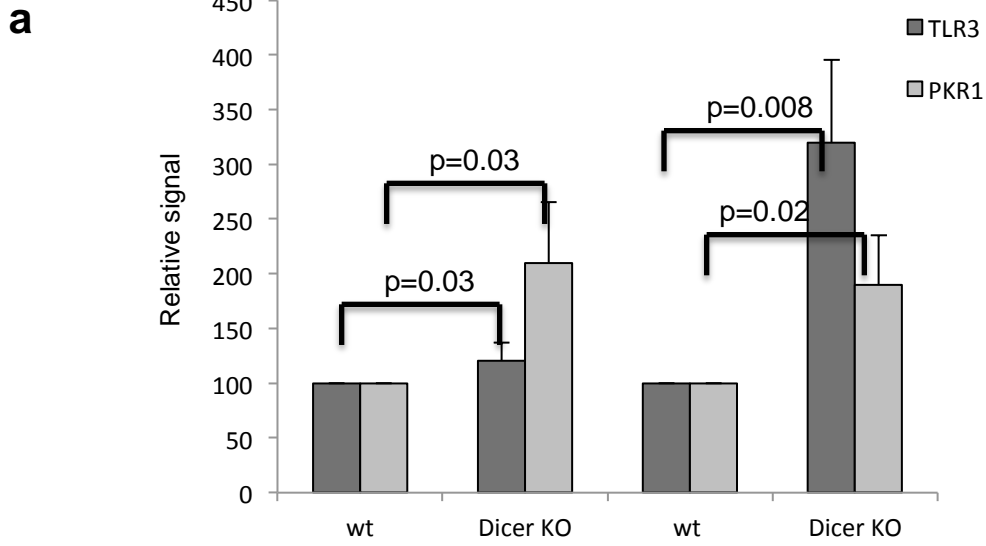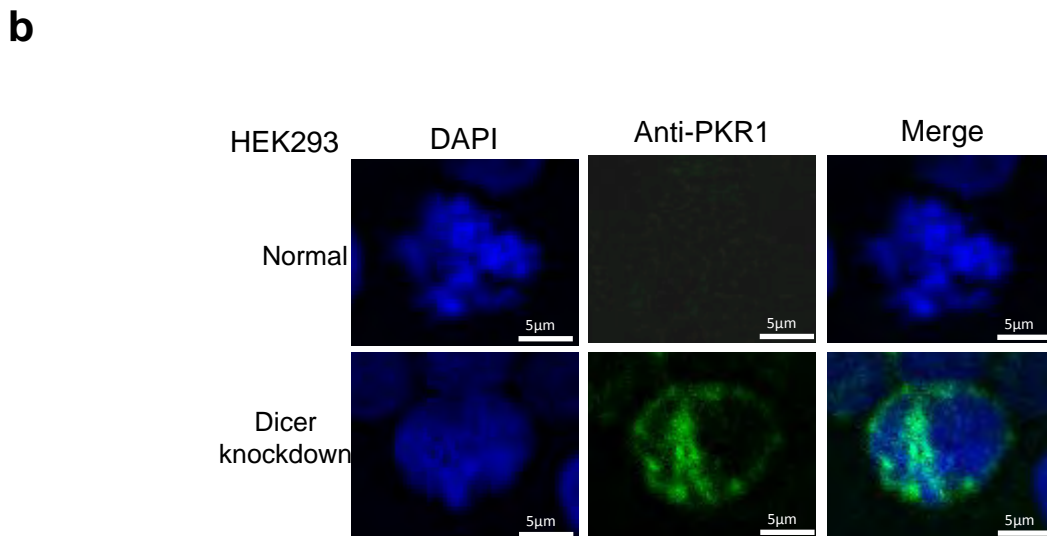

**Supplementary Figure 7. Loss of Dicer triggers the interferon response.**

a) Quantitation of Western blot analysis of cell extracts isolated from normal and Dicer knockdown HEK293 cells, growing in tissue culture for 1 or 2 weeks using antibodies specific to Dicer, TLR3, PKR1 and  $\gamma$ -actin (see Figure 7a). Signals were measured by image-Quant software, are expressed as a % of input and are expressed as an average of three independent experiments, normalised to normal HEK293 cell levels, set as 1. \* indicates statistical significance ( $p < 0.05$ ), based on unpaired, two-tailed distribution Student's t-test.

b) IF as in Figure 4c using anti-PKR antibody (green).



# White\_Supplementary Figure 8

**a**

Normal

Dicer knockdown

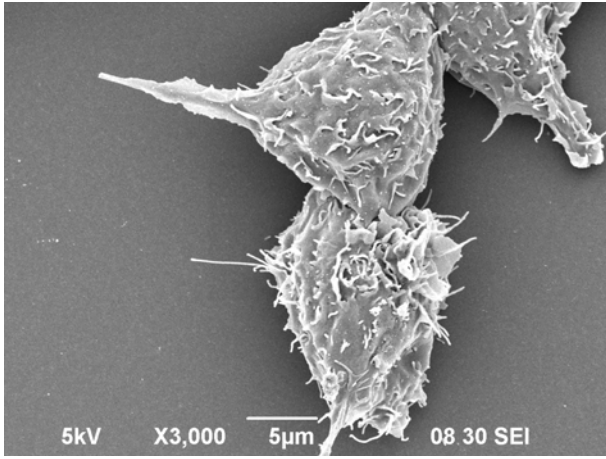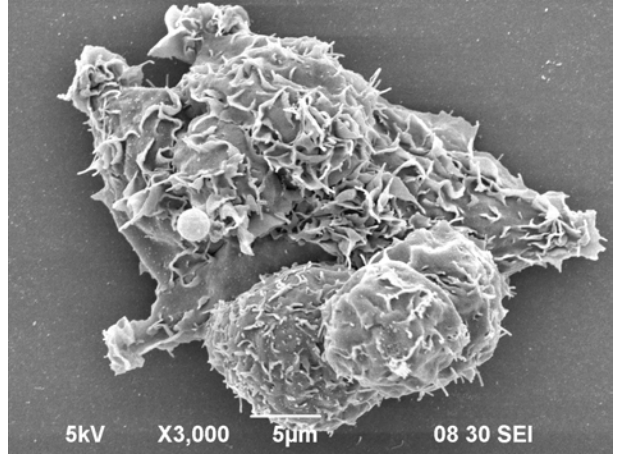

**b**

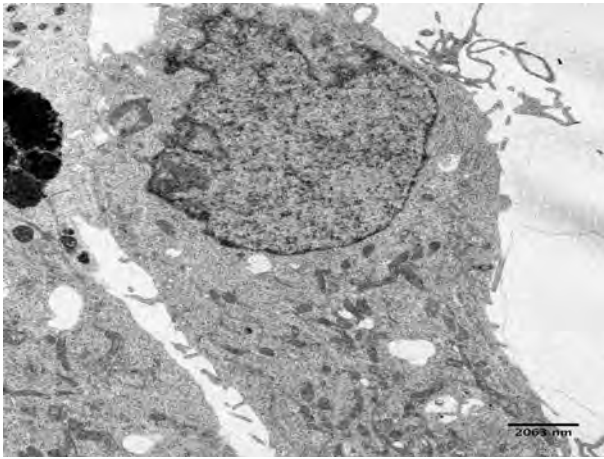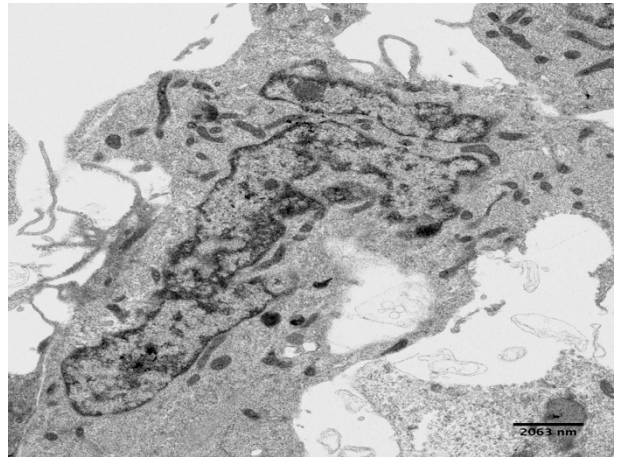

**c**

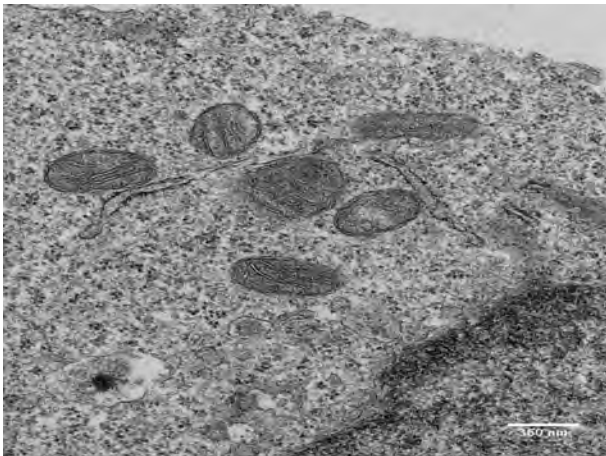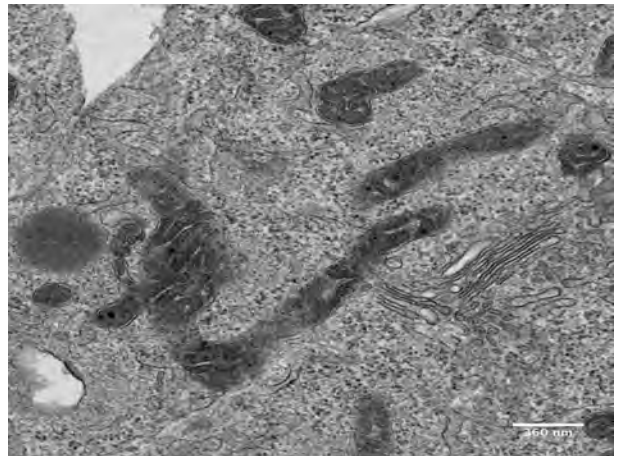

**Supplementary Figure 8. Loss of Dicer triggers the interferon response.**

a) Morphological changes of normal and Dicer knockdown HEK293 cells using Electron Microscopy (SEM) at 3000-fold magnification.

b) TEM analysis of nuclear structure in normal and Dicer knockdown HEK293.

c) TEM as in middle panel focusing on mitochondria.

Representative images from 20 cells are presented.

# White\_Supplementary Figure 9

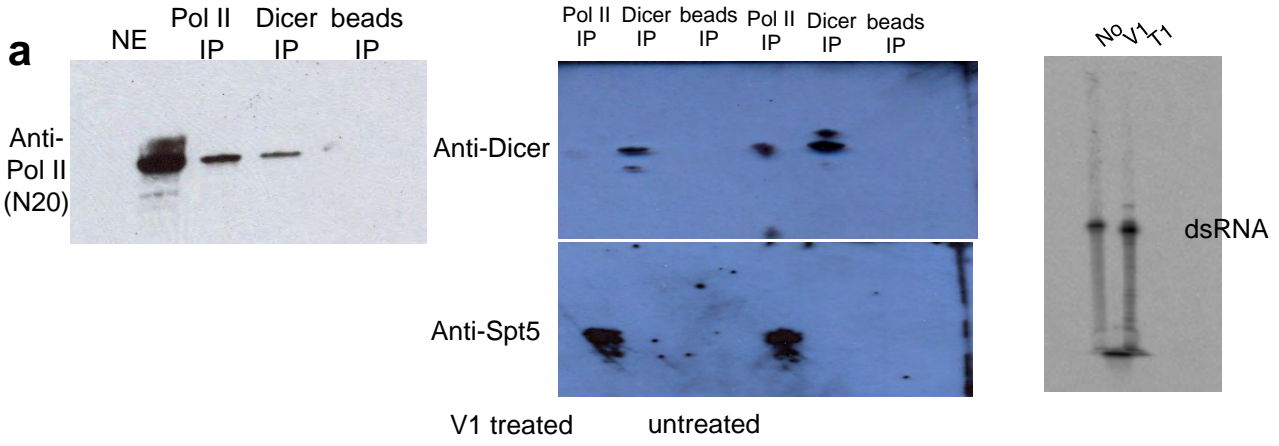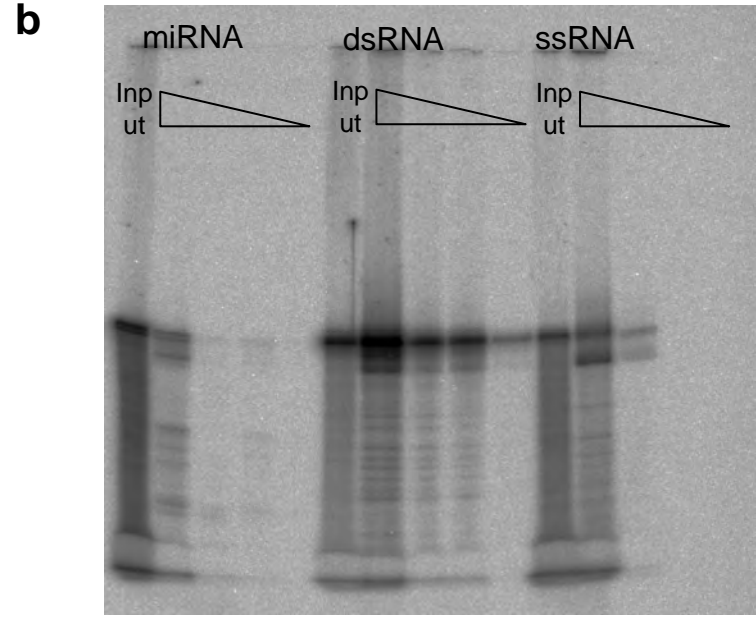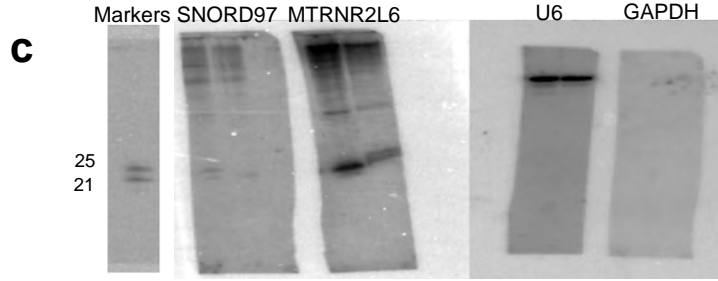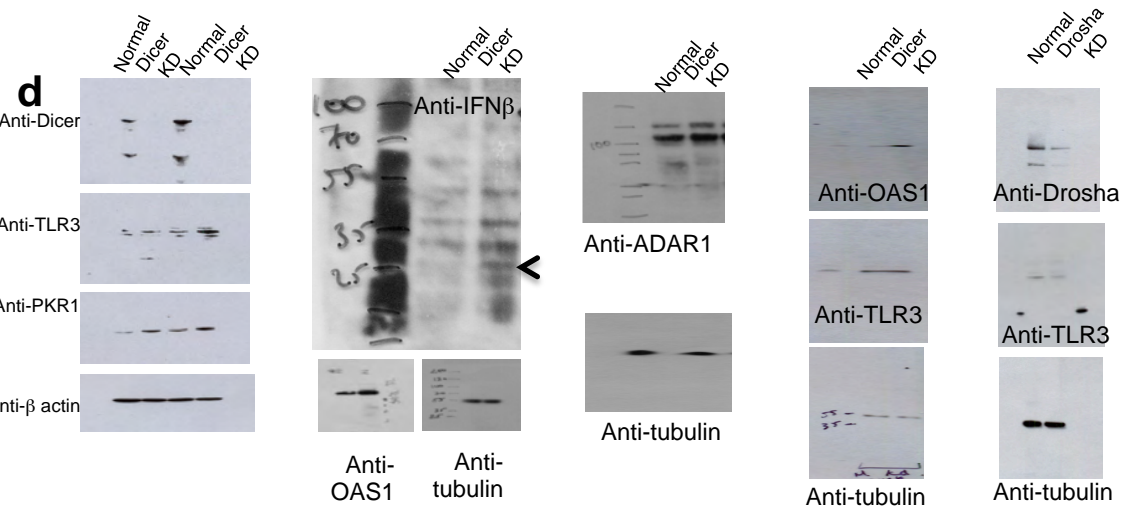

**Supplementary Figure 9. Uncropped blot images.**

a) Relating to Figure 2.

b) Relating to Figure 4.

c) Relating to Figure 6.

d) Relating to Figure 7.

Supplementary Table 1 – Primer sequences

| Name              | Sequence                       |
|-------------------|--------------------------------|
| PDE3A fw          | 5'gacatggccttccacatcta         |
| PDE3A rev         | 5'ccatcttcgccttcttcttg         |
| SNORD97 fw        | 5'gaaaatgccctgtttatcctt        |
| SNORD97 rev       | 5'ctttgaatgtccagcgtcct         |
| MTRNR2L6 fw       | 5'gggataacagcgcaatccta         |
| MTRNR2L6 rev      | 5'tagatgggaggtgtggagga         |
| 5' MTRNR2L6 fw    | 5'tccaacacaggcatgtctcta        |
| 5' MTRNR2L6 rev   | 5'aagagacagctgaaccctcg         |
| 5' MTRNR2L6 fw    | 5'tgcctggagtcctagtttagt        |
| 3' MTRNR2L6 rev   | 5'tctgcaaataaggaccccat         |
| PLCH1 fw          | 5'ttgctaaggcaatgaaag           |
| PLCH1 rev         | 5'cctcctgggttcagtggtc          |
| 28S fw            | 5'gcaggaggtgtcagaaaagttaccacag |
| 28S rev           | 5'ctaacctgtctcacgacggtctaaacc  |
| GAPDH fw          | 5'gatgacatcaagaagtggt          |
| GAPDH rev         | 5'ttgacaaagtggtcgttgag         |
| pri-miRNA 15a fw  | 5'accttgagtaaagtagcagcac       |
| pri-miRNA 15a rev | 5'tattttcttcagaagatcag         |
